# Supplementary material for: Loss of iron triggers PINK1/Parkin-independent mitophagy
Source: PubMed Central journal article supplement (PMC3981094; doi:10.1038/embor.2013.168), 2013-11-01

Figure S4C.

Parkin

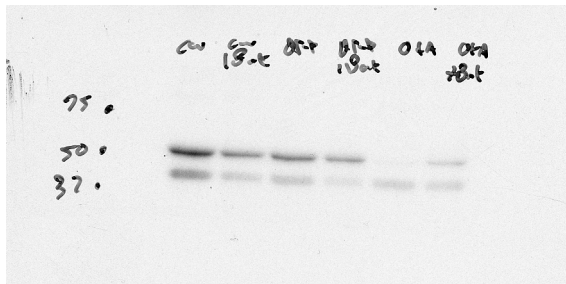

tubulin

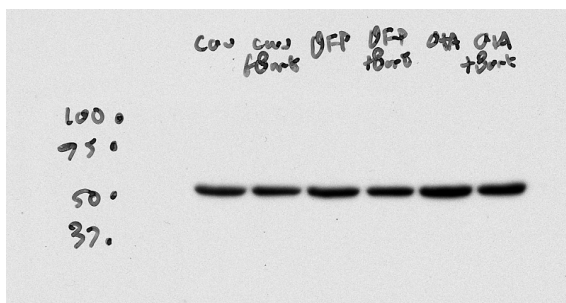

Supplement: embor2013168dfs4.pdf [file embor2013168dfs4.pdf]
